# Supplementary material for: Association between free thyroxine levels and clinical phenotype in first-episode psychosis: a prospective observational study
Source: PeerJ journal article supplement (doi:10.7717/peerj.15347), 2023-06-02

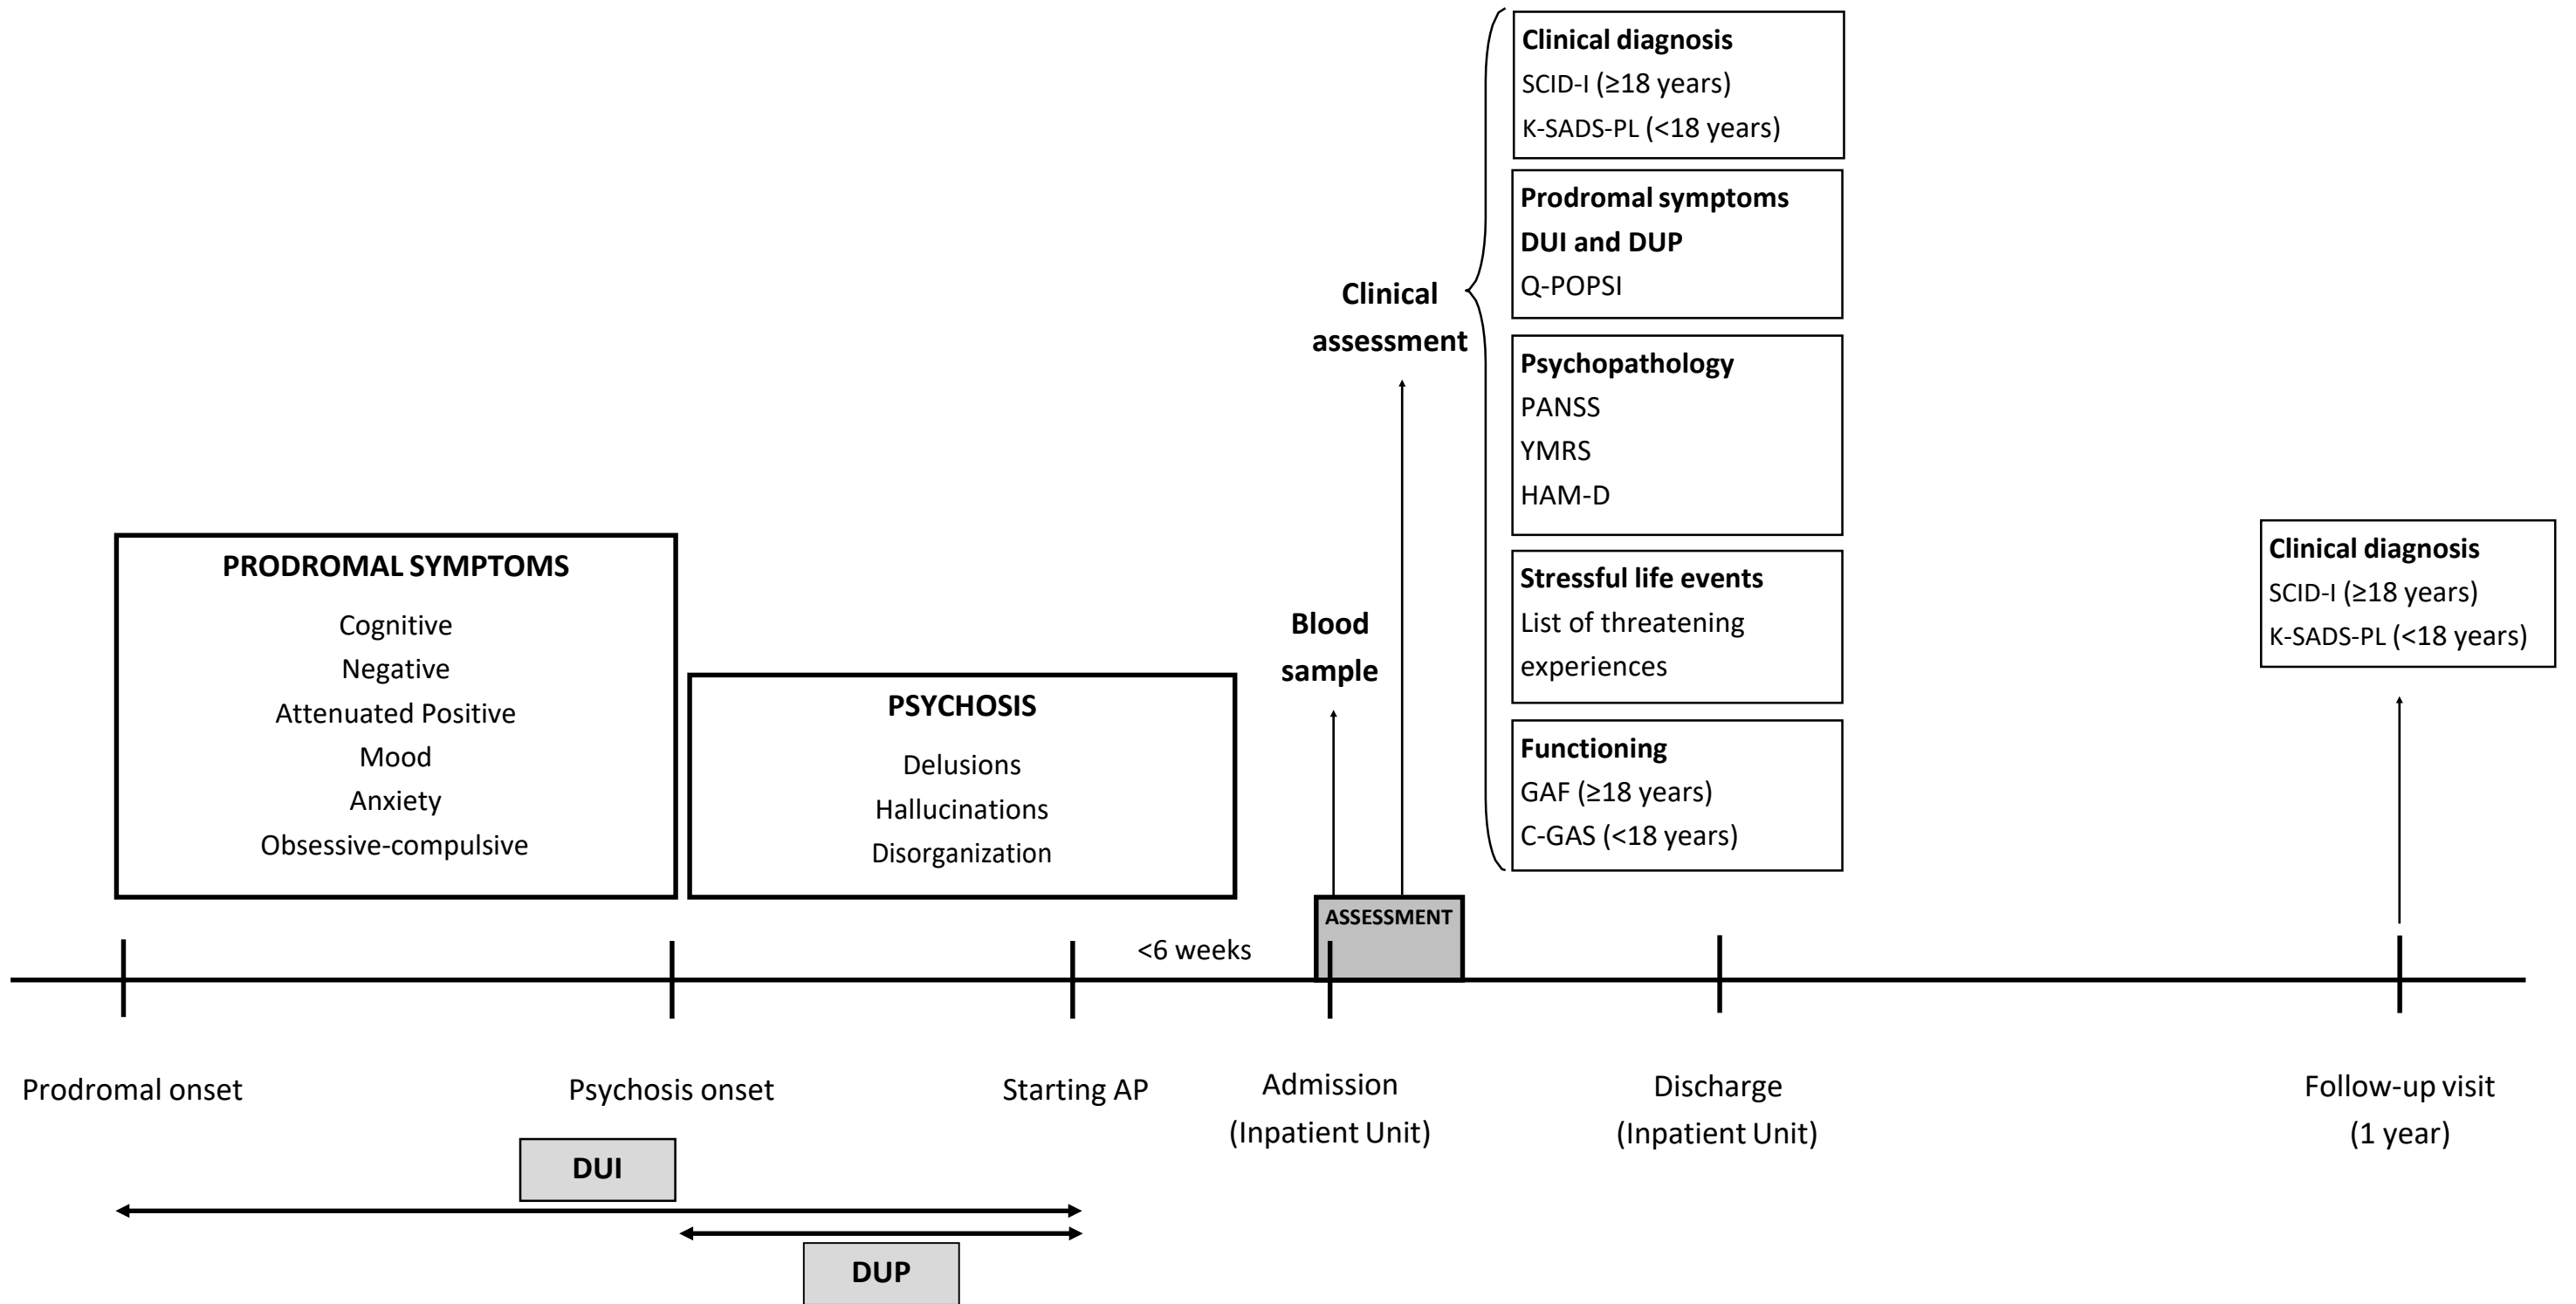

Supplement: FigureS1.pdf [file FigureS1.pdf]
